# Supplementary material for: Effect of A-site cation disorder on oxygen diffusion in perovskite-type Ba0.5Sr0.5Co1−xFexO2.5
Source: Royal Society of Chemistry journal article supplement (doi:10.1039/c3ta10382j), 2013-01-01
Supplement: c3ta10382j.pdf [file c3ta10382j.pdf]

Table S1. Comparison of Buckingham pair potentials for  $\text{Co}^{3+}-\text{O}^{2-}$  in BSC.

| Interaction                    | $A_{ij}/\text{eV}$ | $\rho_{ij}/\text{\AA}$ | $C_{ij}/\text{eV \AA}^6$ | Pseudo cubic lattice parameter $a_p/\text{\AA}$ | MD stability | Reference |
|--------------------------------|--------------------|------------------------|--------------------------|-------------------------------------------------|--------------|-----------|
| $\text{Co}^{3+}-\text{O}^{2-}$ | 1329.82            | 0.3087                 | 0                        | 3.766                                           | Stable       | [1-3]     |
| $\text{Co}^{3+}-\text{O}^{2-}$ | 1007.11            | 0.3069                 | 0                        | 3.586                                           | -            | [4]       |
| $\text{Co}^{3+}-\text{O}^{2-}$ | 1226.31            | 0.3087                 | 0                        | 3.712                                           | -            | [5]       |
| $\text{Co}^{3+}-\text{O}^{2-}$ | 1371.71            | 0.3087                 | 0                        | 3.780                                           | -            | [5]       |
| $\text{Co}^{3+}-\text{O}^{2-}$ | 1156.61            | 0.3087                 | 0                        | 3.679                                           | -            | [5]       |
| $\text{Co}^{3+}-\text{O}^{2-}$ | 1006.61            | 0.3087                 | 0                        | 3.601                                           | -            | [5]       |
| $\text{Co}^{3+}-\text{O}^{2-}$ | 1226.31            | 0.3087                 | 0                        | 3.915                                           | Unstable     | [5]       |
| $\text{Sr}^{2+}-\text{O}^{2-}$ | 682.172            | 0.3945                 | 0                        |                                                 |              | [6]       |
| $\text{Ba}^{2+}-\text{O}^{2-}$ | 905.7              | 0.3976                 | 0                        |                                                 |              | [7]       |
| $\text{O}^{2-}-\text{O}^{2-}$  | 9597.96            | 0.2192                 | 32.00                    |                                                 |              | [5]       |

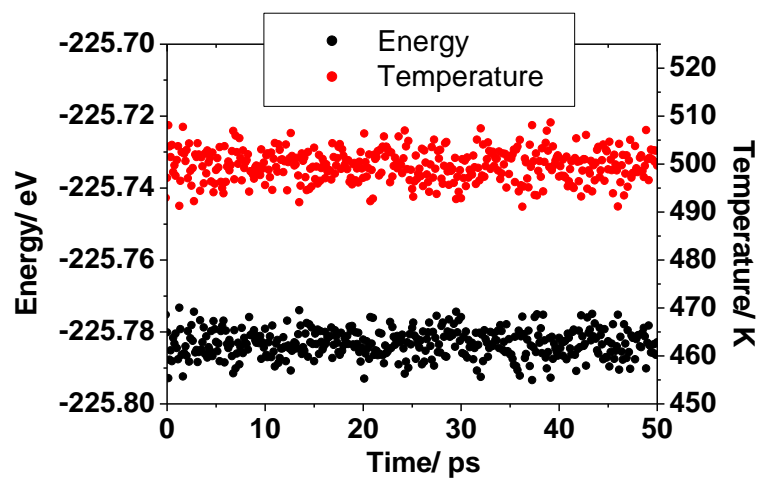

Fig. S1. Configurational energy and temperature for BSCF ( $d = 0.5$ ) at 500 K as a function of time after 50 ps equilibration by MD simulation.

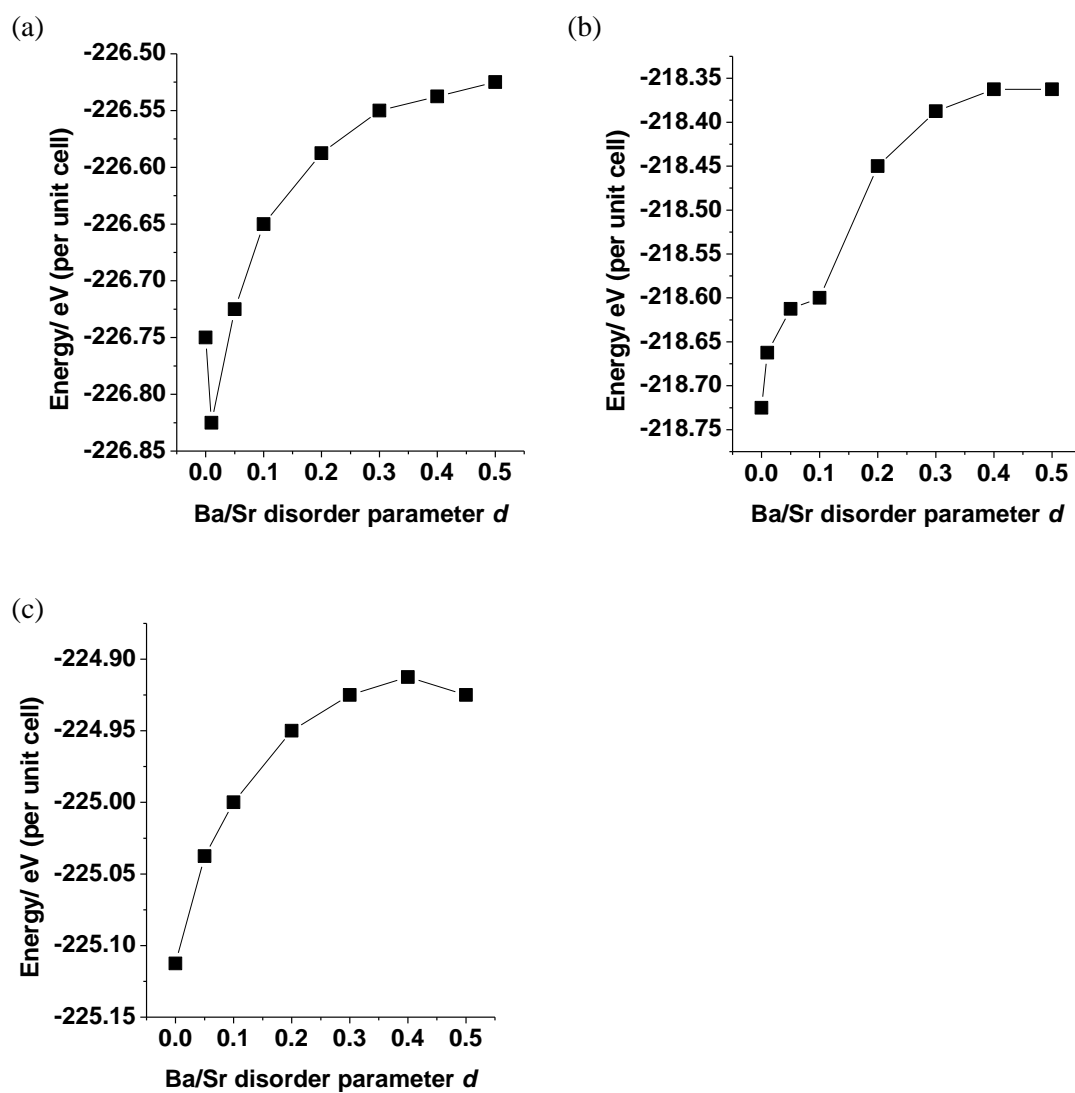

Fig. S2. Configurational energies for (a) BSC, (b) BSF and (c) BSCF as a function of Ba/Sr disorder parameter  $d$ . Energies were averaged during 50 ps of production run after equilibration at 1200 K by MD simulations.

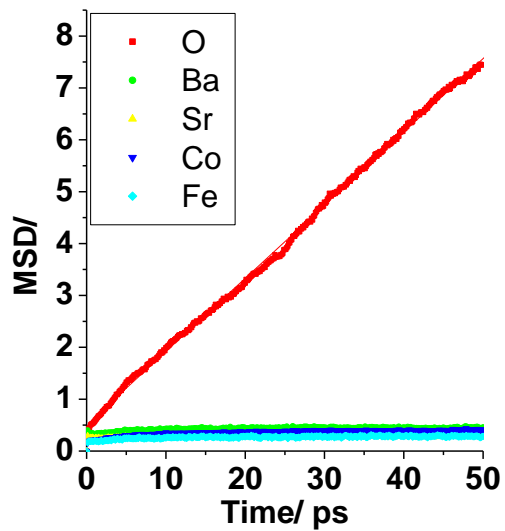

Fig. S3. Mean square displacements (MSDs) of ions in BSCF as a function of time at 2000 K.

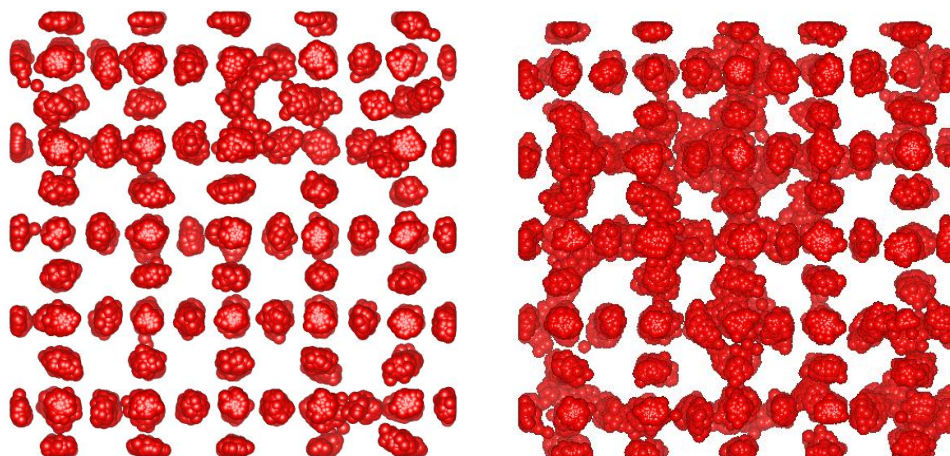

Fig. S4. Trajectories of oxygen atoms (red) in MD simulations for BSCF with ordered ( $d=0$ , left panel) and disordered ( $d=0.5$ , right panel) Ba/Sr arrangement at 1200 K. Both the figures were viewed along  $c$ -axis. Note that three oxygen layers, Ba-O, Sr-O, and TM-O<sub>2</sub> layers, are included. (See figure 1 in main text.)

## Reference

- [1] M. Cherry, M.S. Islam, C.R.A. Catlow, *J. Solid State Chem.*, **118** (1995) 125-132.
- [2] M.S. Islam, M. Cherry, C.R.A. Catlow, *J. Solid State Chem.*, **124** (1996) 230-237.
- [3] M.T. Buscaglia, V. Buscaglia, M. Viviani, P. Nanni, *J. Am. Ceram. Soc.*, **84** (2001) 376-384.
- [4] S.M. Woodley, C.R.A. Catlow, P. Piszora, K. Stempin, E. Wolska, *J. Sol. State Chem.*, **153** (2000) 310.
- [5] D.J. Binks PhD Thesis, University of Surrey (1994).
- [6] M. McCoy, R. W. Grimes, W. E. Lee, *Philosophical Magazine A*, **75** (1997) 833-846.
- [7] C. R. Stanek PhD Thesis, Imperial College London (2003).
